# Supplementary material
Source: publisher figshare collection journal article supplement (https://brill.figshare.com/articles/dataset/_/5759637)
Supplement: Supplementary file 1 [file 2]

# Effects of Auditory Patterns on Judged Displacements of an Occluded Moving Object

Chayada Chotsrisuparat\*, Arno Koning, Richard Jacobs, Rob van Lier

Radboud University, Donders Institute for Brain, Cognition and Behaviour,  
Nijmegen, The Netherlands

## Supplemental information

### Experiment 2

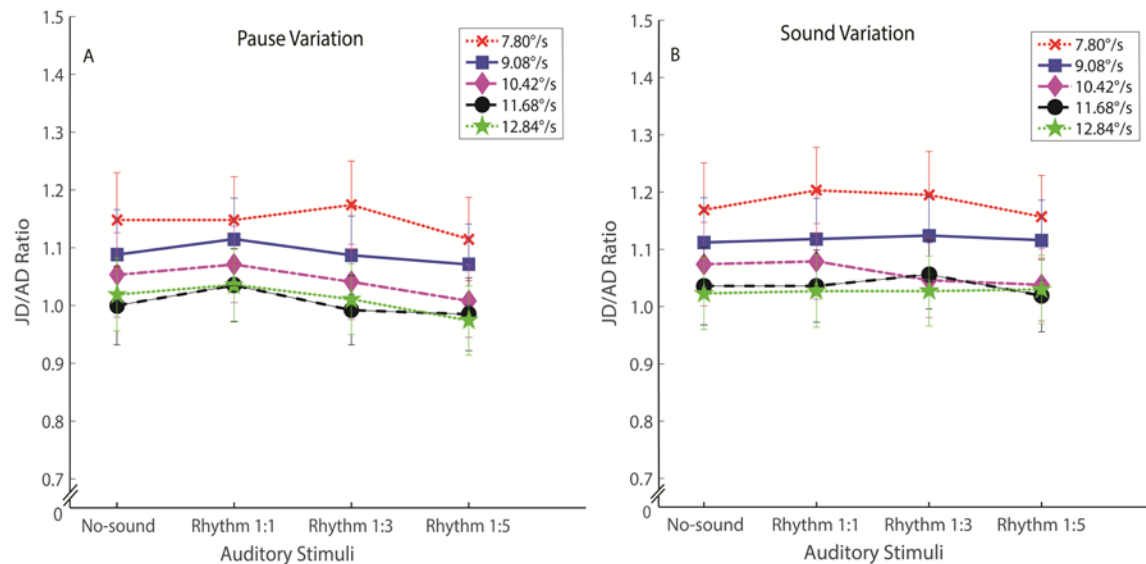

**Figure S1.** The JD/AD ratios as a function of rhythm, disk speed and pause/sound variation of Experiment 2. Error bars indicate  $\pm 1$  SEM.

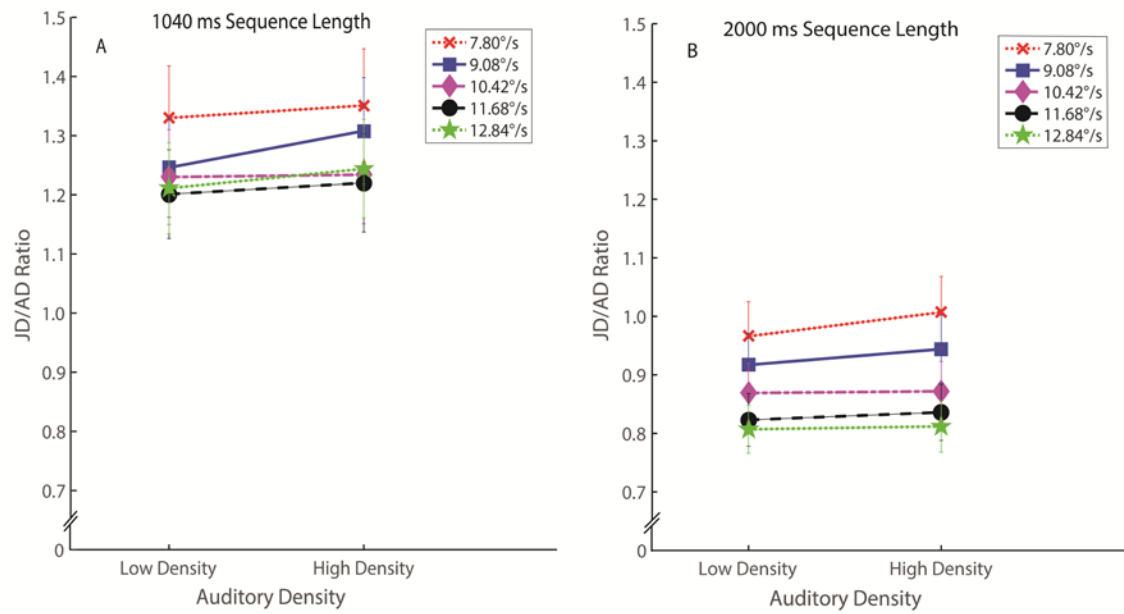

**Figure S2.** The JD/AD ratios as a function of auditory density, disk speed and sequence length of Experiment 2. Error bars indicate  $\pm 1$  SEM.
